# Supplementary material for: QTL Analysis and Candidate Gene Mapping for the Polyphenol Content in Cider Apple
Source: PubMed Central journal article supplement (PMC4182701; doi:10.1371/journal.pone.0107103), 2014-10-01

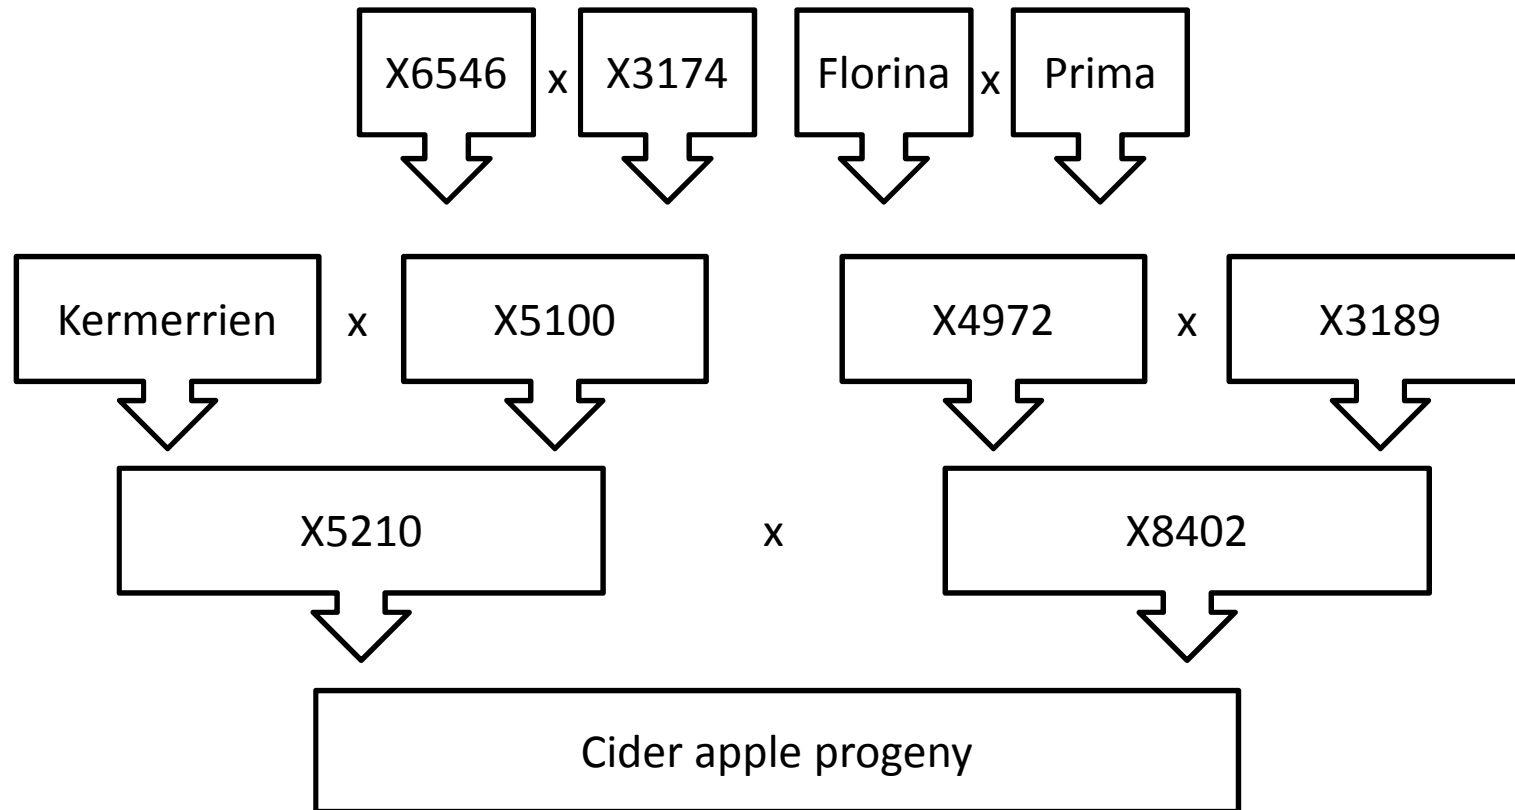

Supplement: pone.0107103.s001.pdf [file pone.0107103.s001.pdf]
